# Supplementary material for: Porous FeP/CoP heterogeneous materials as efficient alkaline oxygen evolution reaction (OER) catalysts
Source: Royal Society of Chemistry journal article supplement (doi:10.1039/d2nj01557a), 2022-01-01
Supplement: d2nj01557a1.pdf [file d2nj01557a1.pdf]

## Supporting Information

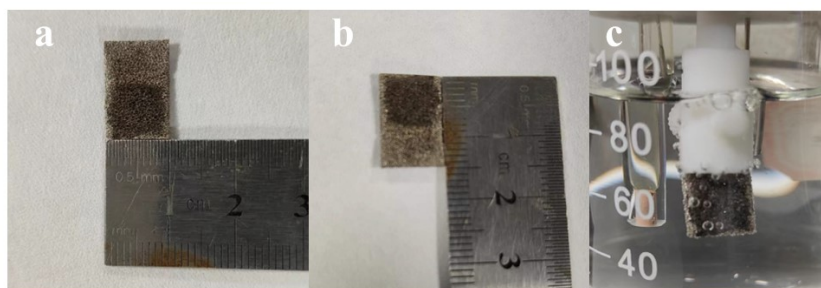

Fig. S1 Digital photos of self-made working electrode (a-b) and working electrode during OER catalytic process (c).

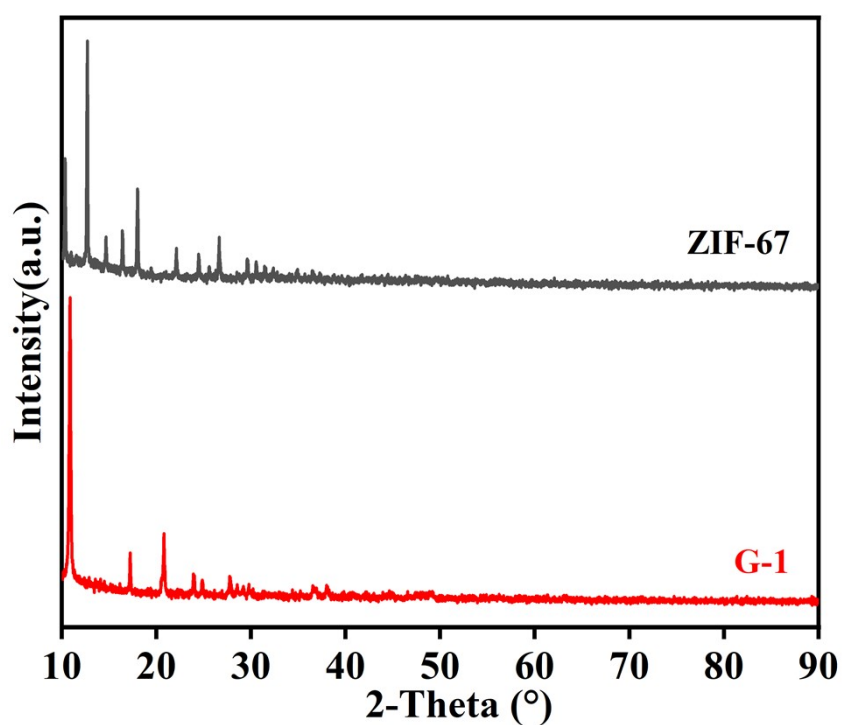

Fig. S2 the XRD pattern of the ZIF-67 and G-1.

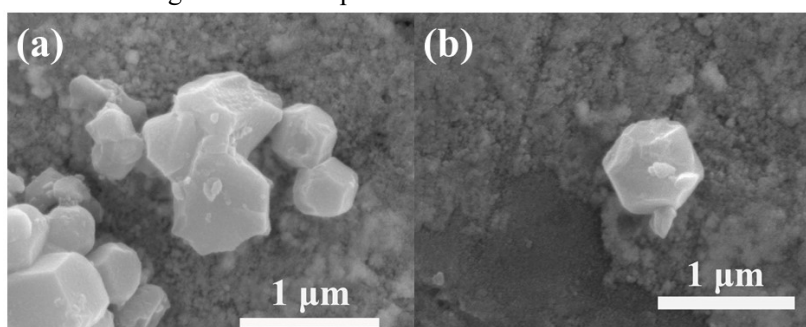

Fig. S3 the SEM images of ZIF-67.

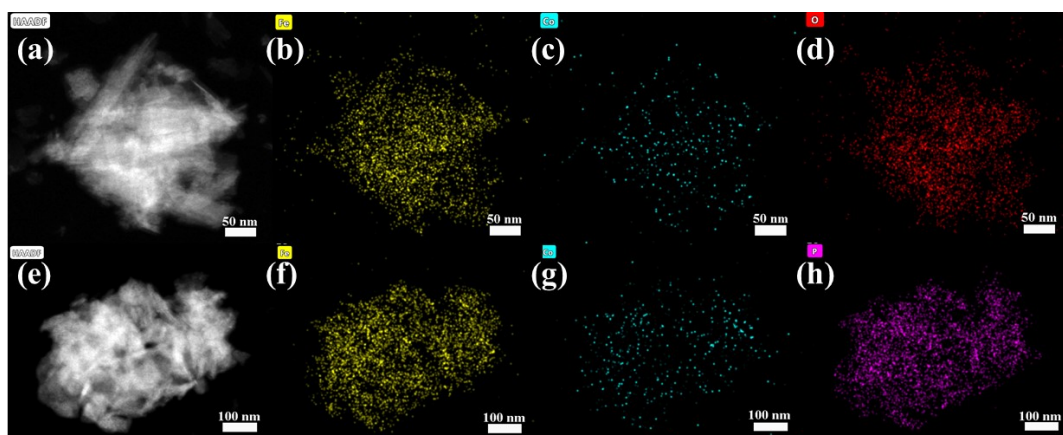

Fig. S4 EDS mapping of FG-1(a–d) and FeP/CoP(e–f).

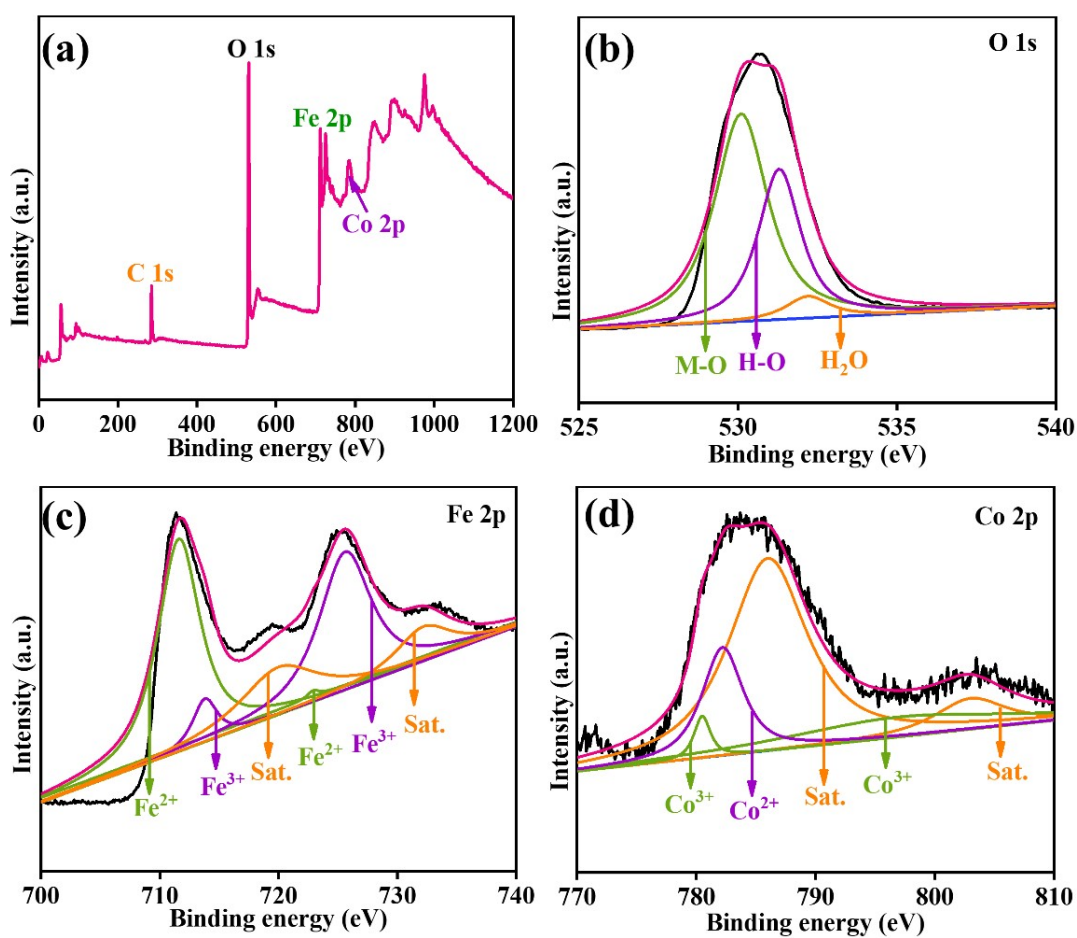

Fig. S5 (a)XPS full spectrum, (b) O 1s fine spectrum, (c) Fe 2p fine spectrum, (d) Co 2p fine spectrum of FG-1.
